# Supplementary material
Source: Springer Nature journal article supplement (https://www.springermedizin.de/resource/supplementary/13024_2014_540_MOESM5_ESM.pdf/9644348)
Supplement: MOESM5 [file 9644348]

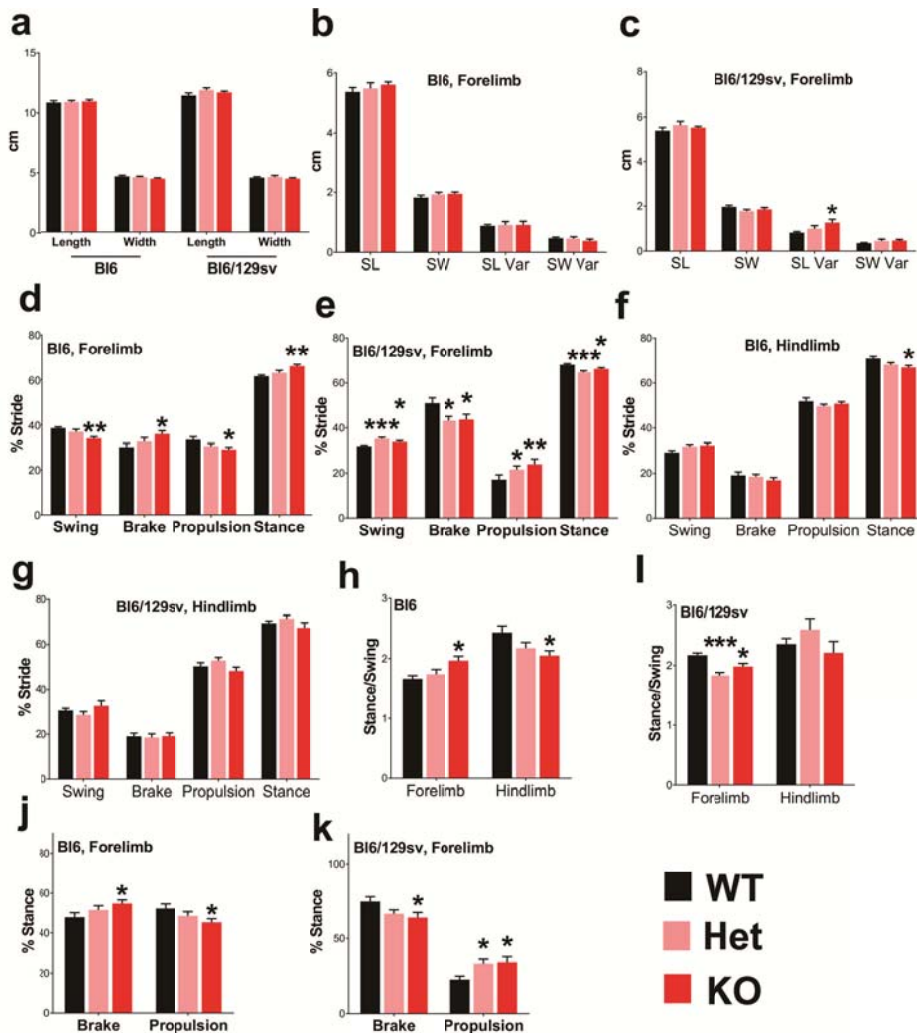

**Figure S5.** Additional parameters analyzed by Digigait apparatus. **a-k)** parameters from Digigait analysis: the length and width of mice (**a**), stride length, stance width, and variability of forelimb stride of mice in B16 background (**b**), stride length, stance width, and variability of forelimb stride of mice in B16/129sv background (**c**), mean percent time spent in the swing, brake, propulsion, and stance phase of stride for forelimbs of mice in B16 background (**d**), mean percent time spent in the swing, brake, propulsion, and stance phase of stride for forelimbs of mice in B16/129sv background (**e**), mean percent time spent in the swing, brake, propulsion, and stance phase of stride for hindlimbs of mice in B16 background (**f**), mean percent time spent in the swing, brake, propulsion, and stance phase of stride for hindlimbs of mice in B16/129sv background (**g**), the ratio between stance and swing for mice in B16 background (**h**), the ratio between stance and swing for mice in B16/129sv background (**i**), mean percent time spent in the brake and propulsion phase of stance for forelimbs of mice in B16 background (**j**), and mean percent time spent in the brake and propulsion phase of stance for forelimbs of mice in B16/129sv background (**k**) One-way ANOVAs were performed to test the differences versus age-matched wild type mice for each individual parameter. \*  $p < 0.05$ , \*\*  $p < 0.01$ , \*\*\*  $p < 0.001$ . n as indicated. Data are means  $\pm$  SEM.
